# Supplementary material for: Once-per-step control of ankle-foot prosthesis push-off work reduces effort associated with balance during walking
Source: Springer Nature journal article supplement (doi:10.1186/s12984-015-0027-3), 2015-04-30
Supplement: MOESM2 [file 9769730]

# 1 Additional File 2

## 2 1. Additional measures of balance-related effort

3 Here we graphically present the measures of balance-related effort that were not included as figures in the  
 4 main text (Fig. A1). In particular, step width variability measured using marker data (rather than center  
 5 of pressure as shown in the main text) was affected by control gain (ANOVA,  $p = 0.03$ ), with stabilizing  
 6 control resulting in reduced variability. Step width variability was 10% lower in the Stabilizing High Gain  
 7 condition than in the Zero Gain condition ( $p = 0.03$ ) and 12% lower than in the Destabilizing Low Gain  
 8 condition ( $p = 0.02$ ).

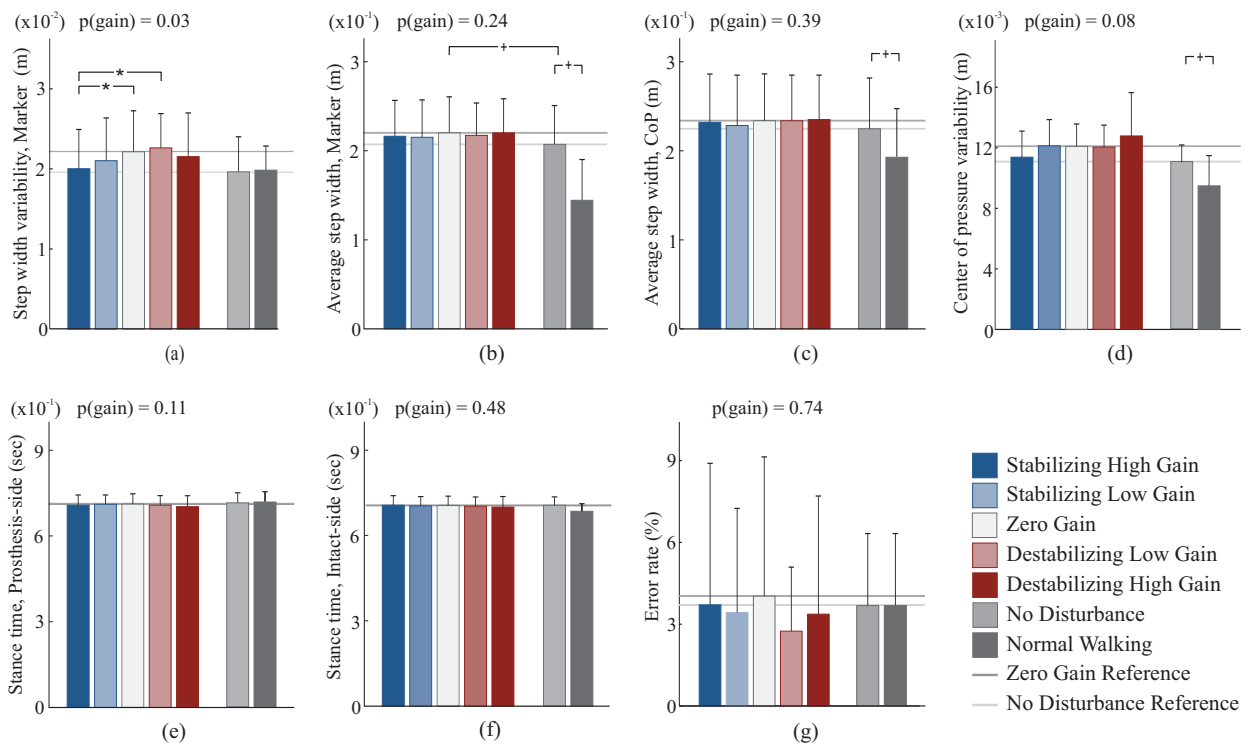

Figure A1: **Additional measures of balance-related effort.** (a) Step width variability based on foot markers tracked by a camera-based motion capture system decreased with Stabilizing control. (b) Average step width based on foot markers was greater with the prosthesis and with the disturbance. (c) Average step width based on Center of Pressure (CoP) measured using an instrumented treadmill was similarly affected. (d) Center of Pressure variability within steps seemed to be reduced with Stabilizing control. (e) Prosthesis-side stance time was unchanged across all conditions. (f) Intact-side stance time was unchanged across all conditions. (g) Error rate for the distraction task was unchanged across all conditions. Blue bars correspond to Stabilizing control conditions, white bars to the Zero Gain condition, and red bars to Destabilizing conditions. Darker blue and red bars correspond to High Gains. Light gray bars correspond to the No Disturbance condition, and dark gray bars correspond to the Normal Walking condition. Asterisks (\*) indicate statistical significance among control gain conditions, and pluses (+) indicate statistical significance among baseline conditions.

## 2. Balance-related effort measured before application of the distraction task

We also analyzed balance-related measures from data taken during minutes four to six of each trial (see cf. Fig. 4 for the trial structure), prior to application of the distraction task (Fig. A2). We found similar results to those with the distraction task, reported in the main text. Metabolic energy use without the distraction task was affected by control gain (ANOVA,  $p = 0.001$ ), with Stabilizing conditions leading to lower metabolic rate. For example, metabolic rate in the Stabilizing High Gain condition was 9% lower

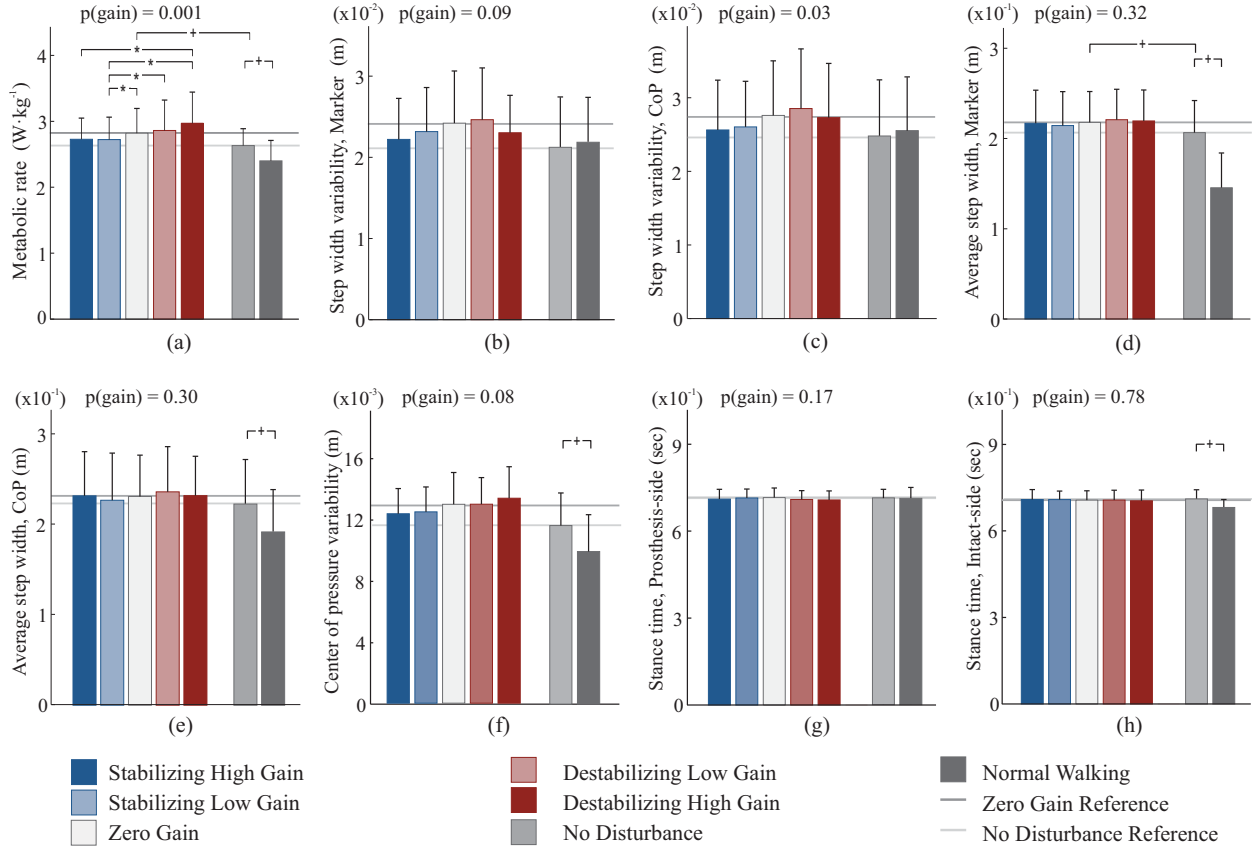

Figure A2: **Measures of balance-related effort without the distraction task.** (a) Metabolic rate was reduced by Stabilizing control conditions. (b) Step width variability based on foot markers tended to be lower with Stabilizing control. (c) Step width variability based on Center of Pressure (CoP) was reduced by Stabilizing gains. (d) Average step width based on foot markers was not affected by control gain. (e) Average step width based on Center of Pressure (CoP) was not affected by control gain. (f) Within-step center of pressure variability tended to be lower with Stabilizing control. (g) Prosthesis-side stance time was unchanged across conditions. (h) Intact-side stance time was unchanged by control gain. Blue bars correspond to Stabilizing control conditions, white bars to the Zero Gain condition, and red bars to Destabilizing conditions. Darker blue and red bars correspond to High Gains. Light gray bars correspond to the No Disturbance condition, and dark gray bars correspond to the Normal Walking condition. Asterisks (\*) indicate statistical significance among control gain conditions, and pluses (+) indicate statistical significance among baseline conditions.

15 than in the Destabilizing High Gain condition ( $p = 0.008$ ). Step width variability measured using center  
16 of pressure was affected by control gain (ANOVA,  $p = 0.03$ ), with Stabilizing conditions resulting in lower  
17 variability. A similar trend was observed for step width variability measured using foot markers (ANOVA,  
18  $p = 0.09$ ). Changes in step width variability showed less statistical significance than those during the  
19 distraction task period, perhaps because the added cognitive load of the distraction task made prosthesis  
20 control more important. Another possibility is that arm motions were affected by holding the clicker used to  
21 complete the distraction task, or that the clicker was not held consistently during the first portion of each trial  
22 before the distraction task was applied. Baseline comparisons showed similar trends as with the distraction  
23 task; wearing the prosthesis (No Disturbance vs. Normal Walking) increased metabolic rate, average step  
24 width and within-step center of pressure variability, while the disturbance (Zero Gain vs. No Disturbance)  
25 increased metabolic rate and average step width. Other outcomes were not statistically significant.

### 26 3. The effect of randomly changing push-off work on balance-related effort

27 We tested an additional baseline condition in which push-off work was randomly changed on each step, and  
 28 measured the same balance-related outcomes both with and without the distraction task (Fig. A3). We  
 29 hypothesized that if push-off work had a strong effect on balance, changing it randomly would strongly  
 30 increase balance-related effort for the human. We found that random push-off work increased metabolic rate  
 31 by about 8% compared to the No Disturbance condition ( $p = 0.02$ ). Random push-off work also increased  
 32 within-step center of pressure variability ( $p = 0.04$ ) and reduced user preference ( $p = 0.007$ ). Other measures  
 33 of balance-related effort tended to increase with random push-off work.

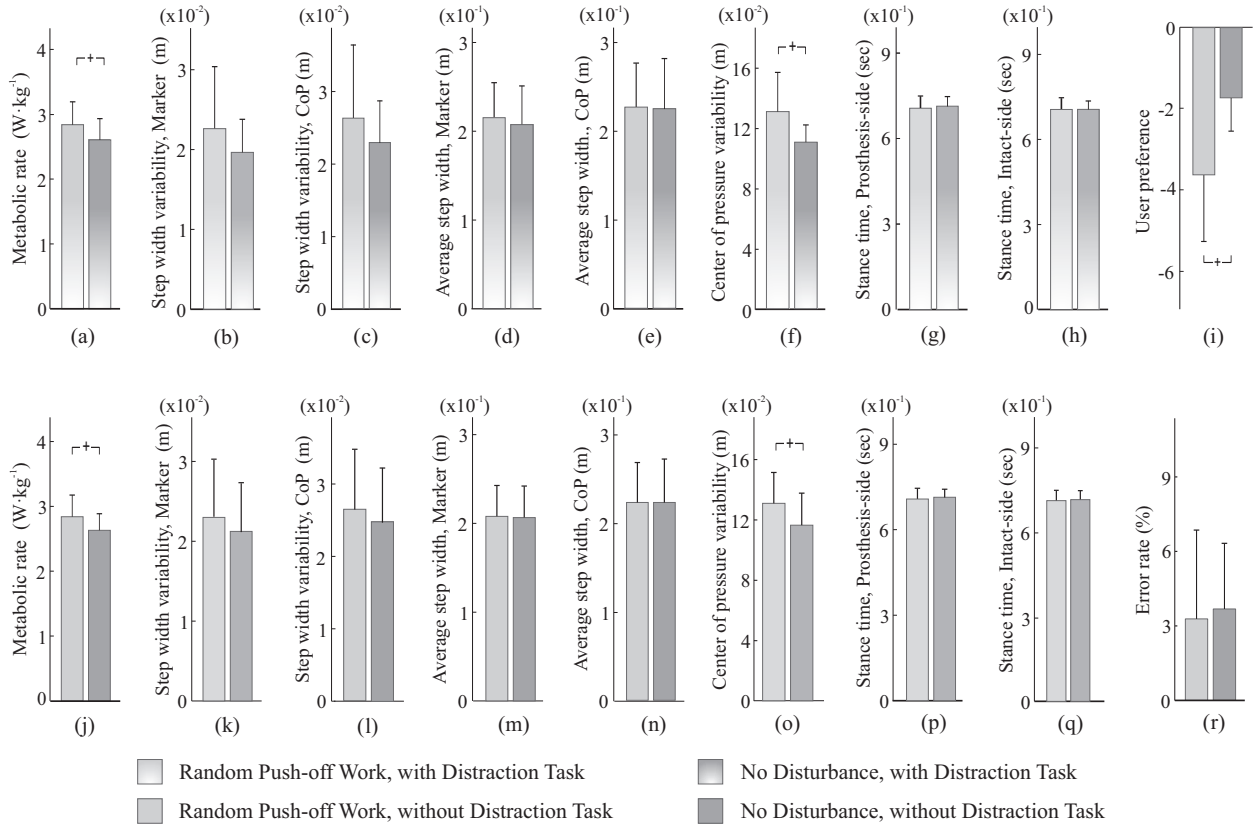

Figure A3: **The effects of random push-off work on balance-related effort.** *Top:* with the distraction task (minutes six to eight). *Bottom:* without the distraction task (minutes four to six). **(a&j)** Metabolic rate increased with random push-off work. **(b&k)** Step width variability based on foot markers appeared to increase. **(c&l)** Step width variability based on Center of Pressure (CoP) appeared to increase. **(d&m)** Average step width based on foot markers. **(e&n)** Average step width based on Center of Pressure (CoP). **(f&o)** Within-step Center of Pressure variability increased with random push-off work. **(g&p)** Prosthesis-side stance time. **(h&q)** Intact-side stance time. **(i)** User preference decreased with random push-off work. **(r)** Error rate with the distraction task. Light gray bars correspond to the Random Push-off Work condition, and dark gray bars correspond to the No Disturbance condition. Pluses (+) indicate statistical significance (paired t-tests).

34 **4. Average prosthesis push-off work from additional conditions**

35 Average push-off work was unchanged across control gains during the period before the distraction task  
 36 was applied (Fig. A4(a);  $p = 0.8$ ). Application of the disturbance (Zero Gain vs. No Disturbance) slightly  
 37 increased average push-off work. Average push-off work was not changed by the Random Push-off Work  
 38 condition, with or without the distraction task ( $p \geq 0.4$ ).

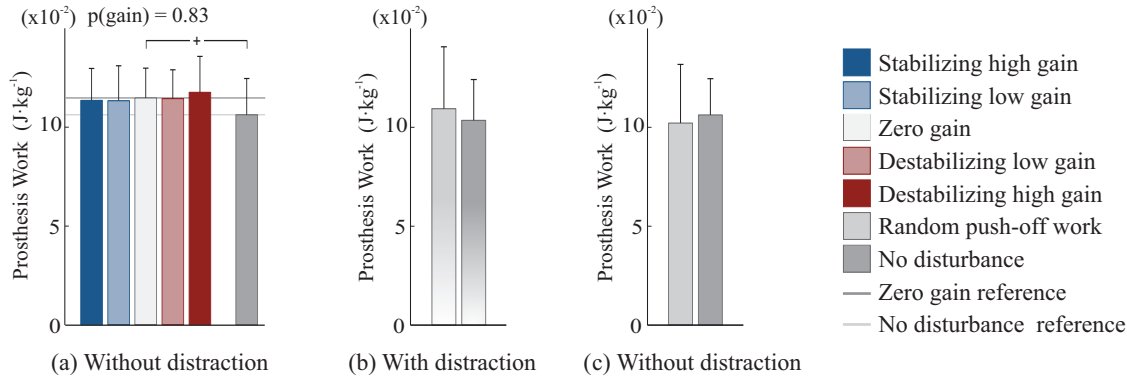

Figure A4: **Average prosthesis push-off work from additional conditions.** (a) Push-off work was unchanged across control gains without the distraction task (just as it was unchanged with the distraction task; cf. Fig. 5). (b&c) Push-off work was unchanged in the Random Push-off Work condition compared to No Disturbance, with or without the distraction task. Blue bars correspond to Stabilizing control conditions, white bars to the Zero Gain condition, and red bars to Destabilizing conditions. Darker blue and red bars correspond to High Gains. Light gray bars correspond to the Random Push-off Work condition and dark gray bars correspond to the No Disturbance condition. Asterisks (\*) indicate statistical significance among control gain conditions, and pluses (+) indicate statistical significance among baseline conditions.

39 **5. Tables of numerical values**

40 Tables A1 and A2 provide the means and standard deviations, respectively, of all balance-related outcomes in  
 41 the study. In these tables, Stab., Destab., Distract., Disturb., var., avg., CoP, and pref. stand for Stabilizing,  
 42 Destabilizing, Distraction, Disturbance, variability, average, center of pressure and preference, respectively.

Table A1: Mean values for all balance-related outcomes

| Measurement                             | Distract.<br>task | Stab.<br>High Gain | Stab.<br>Low Gain | Zero<br>Gain | Destab.<br>Low Gain | Destab.<br>High Gain | Random<br>Push-off | No<br>Disturb. | Normal<br>Walking |
|-----------------------------------------|-------------------|--------------------|-------------------|--------------|---------------------|----------------------|--------------------|----------------|-------------------|
| Metabolic rate<br>(W·Kg <sup>-1</sup> ) | with              | 2.647              | 2.732             | 2.802        | 2.820               | 2.885                | 2.840              | 2.605          | 2.333             |
|                                         | without           | 2.727              | 2.722             | 2.820        | 2.860               | 2.970                | 2.840              | 2.632          | 2.400             |
| Step width var.<br>(marker) (m)         | with              | 0.020              | 0.021             | 0.022        | 0.023               | 0.022                | 0.023              | 0.020          | 0.020             |
|                                         | without           | 0.022              | 0.023             | 0.024        | 0.025               | 0.023                | 0.023              | 0.021          | 0.022             |
| Step width var.<br>(CoP) (m)            | with              | 0.023              | 0.024             | 0.025        | 0.026               | 0.026                | 0.026              | 0.023          | 0.022             |
|                                         | without           | 0.026              | 0.026             | 0.028        | 0.029               | 0.027                | 0.026              | 0.025          | 0.026             |
| Avg. step width<br>(marker) (m)         | with              | 0.216              | 0.215             | 0.220        | 0.217               | 0.220                | 0.212              | 0.207          | 0.144             |
|                                         | without           | 0.217              | 0.214             | 0.218        | 0.221               | 0.220                | 0.208              | 0.207          | 0.145             |
| Avg. step width<br>(CoP) (m)            | with              | 0.232              | 0.228             | 0.234        | 0.234               | 0.235                | 0.227              | 0.225          | 0.193             |
|                                         | without           | 0.232              | 0.227             | 0.231        | 0.236               | 0.232                | 0.223              | 0.223          | 0.192             |
| Within-step<br>CoP var. (m)             | with              | 0.011              | 0.012             | 0.012        | 0.012               | 0.013                | 0.013              | 0.011          | 0.010             |
|                                         | without           | 0.012              | 0.013             | 0.013        | 0.013               | 0.013                | 0.013              | 0.012          | 0.010             |
| Error rate (%)<br>User pref.            | with              | 3.656              | 3.379             | 3.933        | 2.099               | 3.298                | 3.279              | 3.682          | 3.020             |
|                                         | -                 | -3.090             | -3.275            | -3.625       | -3.950              | -3.600               | -3.650             | -1.850         | 0.000             |

Table A2: Standard deviations for all balance-related outcomes

| Measurement                             | Distract.<br>task | Stab.<br>High Gain | Stab.<br>Low Gain | Zero<br>Gain | Destab.<br>Low Gain | Destab.<br>High Gain | Random<br>Push-off | No<br>Disturb. | Normal<br>Walking |
|-----------------------------------------|-------------------|--------------------|-------------------|--------------|---------------------|----------------------|--------------------|----------------|-------------------|
| Metabolic rate<br>(W·Kg <sup>-1</sup> ) | with              | 0.328              | 0.387             | 0.373        | 0.459               | 0.479                | 0.353              | 0.329          | 0.269             |
|                                         | without           | 0.321              | 0.340             | 0.376        | 0.462               | 0.474                | 0.333              | 0.255          | 0.310             |
| Step width var.<br>(marker) (m)         | with              | 0.005              | 0.005             | 0.005        | 0.004               | 0.005                | 0.008              | 0.004          | 0.003             |
|                                         | without           | 0.005              | 0.005             | 0.006        | 0.006               | 0.005                | 0.007              | 0.006          | 0.005             |
| Step width var.<br>(CoP) (m)            | with              | 0.006              | 0.006             | 0.006        | 0.006               | 0.008                | 0.010              | 0.006          | 0.004             |
|                                         | without           | 0.007              | 0.006             | 0.007        | 0.008               | 0.007                | 0.008              | 0.008          | 0.007             |
| Avg. step width<br>(marker) (m)         | with              | 0.040              | 0.042             | 0.041        | 0.036               | 0.038                | 0.039              | 0.043          | 0.045             |
|                                         | without           | 0.037              | 0.038             | 0.034        | 0.034               | 0.034                | 0.035              | 0.035          | 0.038             |
| Avg. step width<br>(CoP) (m)            | with              | 0.054              | 0.057             | 0.053        | 0.051               | 0.050                | 0.049              | 0.057          | 0.054             |
|                                         | without           | 0.049              | 0.052             | 0.046        | 0.050               | 0.044                | 0.045              | 0.049          | 0.046             |
| Within-step CoP<br>var. (m)             | with              | 0.002              | 0.002             | 0.002        | 0.001               | 0.003                | 0.003              | 0.001          | 0.002             |
|                                         | without           | 0.002              | 0.002             | 0.002        | 0.002               | 0.002                | 0.002              | 0.002          | 0.002             |
| Error rate (%)<br>User pref.            | with              | 5.192              | 3.822             | 5.111        | 2.349               | 4.336                | 3.577              | 2.641          | 2.389             |
|                                         | -                 | 0.896              | 1.742             | 1.737        | 1.571               | 1.792                | 1.616              | 0.755          | 0.000             |

43 **6. Tables of results of statistical analysis of control on balance-related outcomes**

44 The results of repeated measures ANOVA tests for an effect of control gain on balance-related outcomes are  
 45 presented in Table A3. The results of follow-up paired t-tests between controller conditions, only among  
 46 outcomes that showed a significant relationship, are presented in Table A4. Asterisks (\*) denote statistical  
 47 significance ( $\alpha < 0.05$ ).

Table A3: Results of repeated measures ANOVA tests for an effect of control gain

| Measure                  | Distract. task | ANOVA result |
|--------------------------|----------------|--------------|
| Metabolic rate           | with           | 0.005*       |
|                          | without        | 0.001*       |
| Step width var. (marker) | with           | 0.030*       |
|                          | without        | 0.091        |
| Step width var. (CoP)    | with           | 0.049*       |
|                          | without        | 0.030*       |
| Avg. step width (marker) | with           | 0.240        |
|                          | without        | 0.320        |
| Avg. step width (CoP)    | with           | 0.390        |
|                          | without        | 0.300        |
| Within-step CoP var.     | with           | 0.075        |
|                          | without        | 0.074        |
| Error rate               | with           | 0.740        |
| User pref.               | -              | 0.449        |

Table A4: Results of paired t-tests for condition-wise differences among significant outcomes

| Conditions Compared |              | Metabolic rate |         | Step width var. (marker) |         | Step width var. (CoP) |         |
|---------------------|--------------|----------------|---------|--------------------------|---------|-----------------------|---------|
|                     |              | with distract. | without | with distract.           | without | with distract.        | without |
| Zero Gain           | Stab. High   | 0.003*         | 0.070   | 0.027*                   | -       | 0.009*                | 0.094   |
| Zero Gain           | Stab. Low    | 0.058          | 0.018*  | 0.186                    | -       | 0.091                 | 0.234   |
| Zero Gain           | Destab. Low  | 0.802          | 0.363   | 0.636                    | -       | 0.912                 | 0.586   |
| Zero Gain           | Destab. High | 0.243          | 0.053   | 0.553                    | -       | 0.592                 | 0.808   |
| Stab. High          | Stab. Low    | 0.039*         | 0.911   | 0.136                    | -       | 0.068                 | 0.659   |
| Stab. High          | Destab. Low  | 0.020*         | 0.063   | 0.015*                   | -       | 0.046*                | 0.098   |
| Stab. High          | Destab. High | 0.021*         | 0.008*  | 0.055                    | -       | 0.030*                | 0.266   |
| Stab. Low           | Destab. Low  | 0.118          | 0.049*  | 0.135                    | -       | 0.203                 | 0.082   |
| Stab. Low           | Destab. High | 0.079          | 0.011*  | 0.440                    | -       | 0.126                 | 0.272   |
| Destab. Low         | Destab. High | 0.323          | 0.141   | 0.202                    | -       | 0.975                 | 0.181   |

48 **7. Table of results of statistical analysis of baseline conditions**

49 The results of paired t-tests for differences between baseline conditions are presented in Table A5. Asterisks  
 50 (\*) denote statistical significance ( $\alpha < 0.05$ ).

Table A5: Results of paired t-tests comparing balance-related outcomes in baseline conditions

| Measure                  | Distraction task | Random Push-off vs. No Disturbance | Zero Gain vs. No Disturbance | Normal Walking vs. No Disturbance |
|--------------------------|------------------|------------------------------------|------------------------------|-----------------------------------|
| Metabolic rate           | with             | 0.016*                             | 0.011*                       | 0.001*                            |
|                          | without          | 0.017*                             | 0.028*                       | 0.008*                            |
| Step width var. (marker) | with             | 0.077                              | 0.114                        | 0.875                             |
|                          | without          | 0.217                              | 0.058                        | 0.579                             |
| Step width var. (CoP)    | with             | 0.109                              | 0.156                        | 0.598                             |
|                          | without          | 0.094                              | 0.130                        | 0.574                             |
| Avg. step width (marker) | with             | 0.330                              | 0.009*                       | 0.000*                            |
|                          | without          | 0.630                              | 0.009*                       | 0.000*                            |
| Avg. step width (CoP)    | with             | 0.764                              | 0.1330                       | 0.001*                            |
|                          | without          | 0.993                              | 0.184                        | 0.001*                            |
| Within-step CoP var.     | with             | 0.046*                             | 0.102                        | 0.084                             |
|                          | without          | 0.041*                             | 0.184                        | 0.020*                            |
| Error rate               | with             | 0.736                              | 0.513                        | 0.621                             |
| User pref.               | -                | 0.007*                             | 0.001*                       | 0.000*                            |
